# Supplementary material
Source: Elsevier journal article supplement (https://comptes-rendus.academie-sciences.fr/chimie/article/10.1016/j.crci.2010.12.002/file/attach/mmc1.pdf)
Supplement: mmc1 [file mmc1.pdf]

**Supplementary Material for**

**Synthesis, crystal structure and thermal decomposition of Cu(II),  
Co(II), Mn(II) complexes with hetero-ligands containing cysteic  
acid, 4,4'-dimethyl-2,2'-bipyridine and azide**

Asma Lehleh,<sup>[a]</sup> Adel Beghidja,<sup>[a]\*</sup> Chahrazed Beghidja,<sup>[a]</sup> Olivier Mentré,<sup>[b]</sup> and Richard Welter,<sup>[c]\*</sup>

*[a] Unité de Recherche de Chimie de l'Environnement et Moléculaire Structurale (CHEMS),  
Université-Mentouri de Constantine, route Aïn elbey 25000 Constantine, Algérie,*

*[b] Université Lille Nord de France. Unité de Catalyse et de Chimie du Solide, CNRS UMR 8181,  
ENSC Lille – UST Lille, BP 90108, 59652 Villeneuve d'Ascq cedex, France.*

*[c] UMR CNRS 7177, laboratoire Decomet, université de Strasbourg, 4, rue Blaise-Pascal, 67070  
Strasbourg cedex, France*

---

\* [a\\_beghidja@yahoo.fr](mailto:a_beghidja@yahoo.fr), [welter@unistra.fr](mailto:welter@unistra.fr)

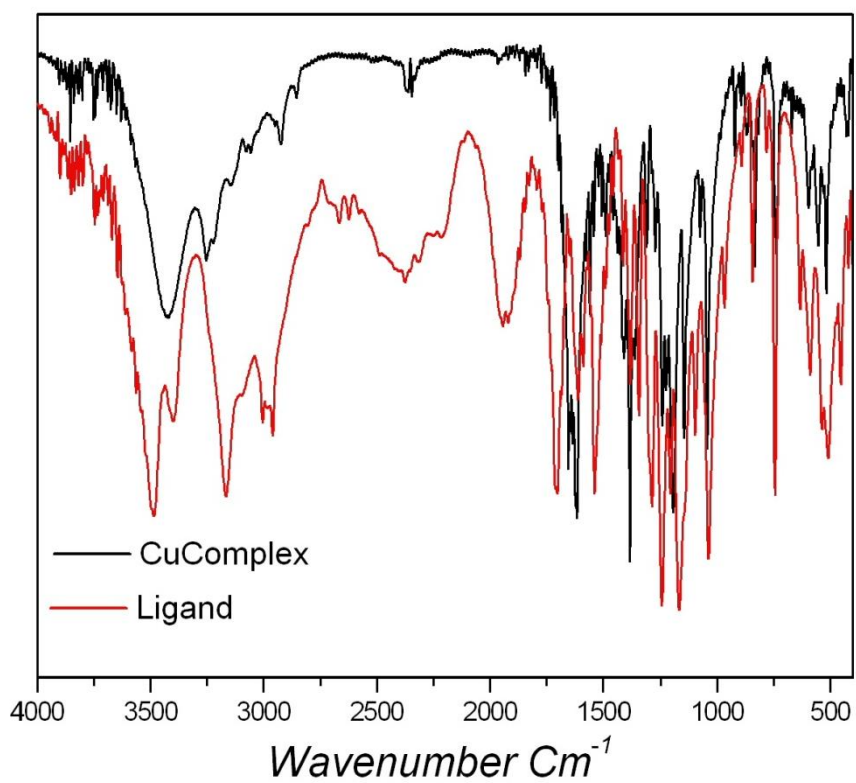

**Fig. S1.** *Infrared spectrum of complex 1 and ligand.*

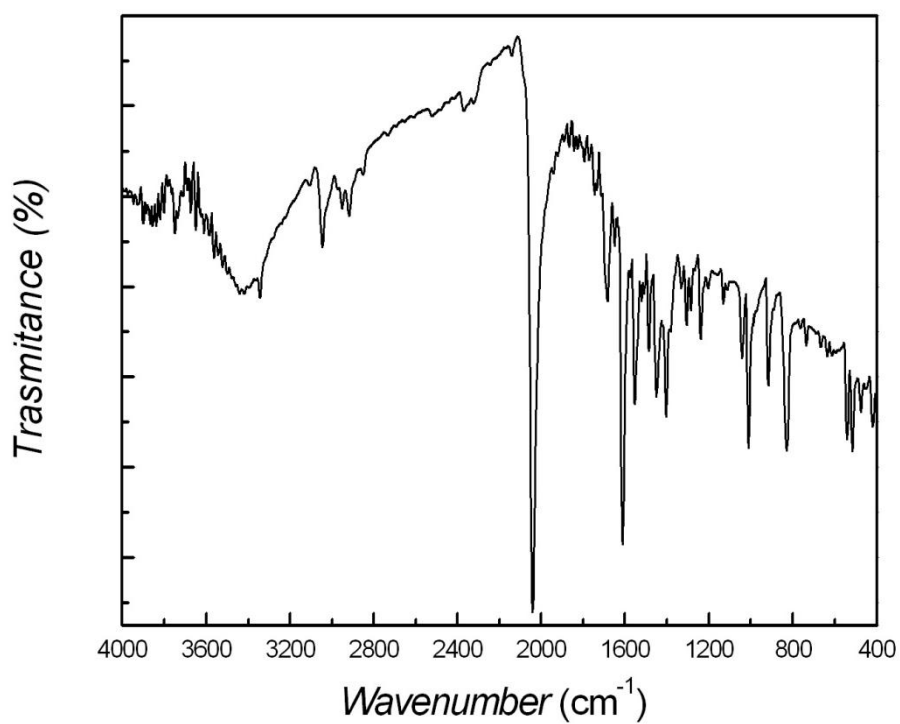

**Fig.S2.** *Infrared spectrum of complex 2.*

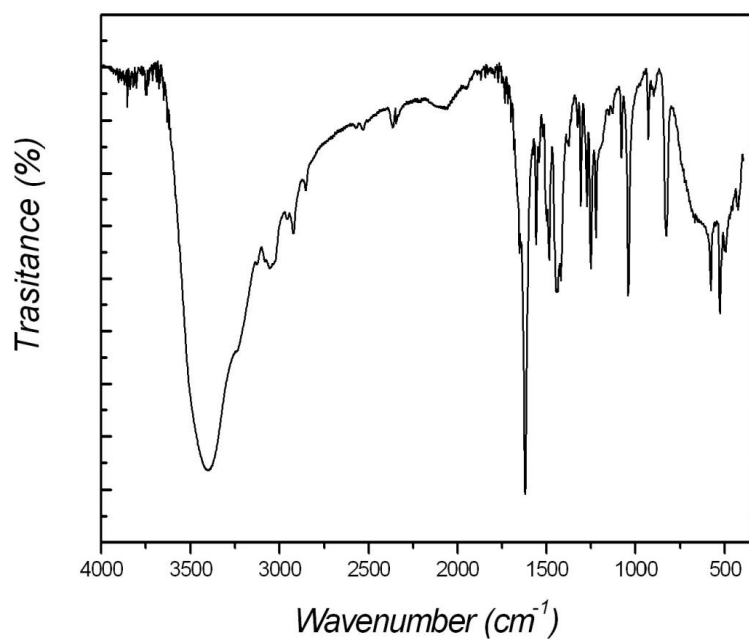

**Fig. S3.** *Infrared spectrum of complex 3.*

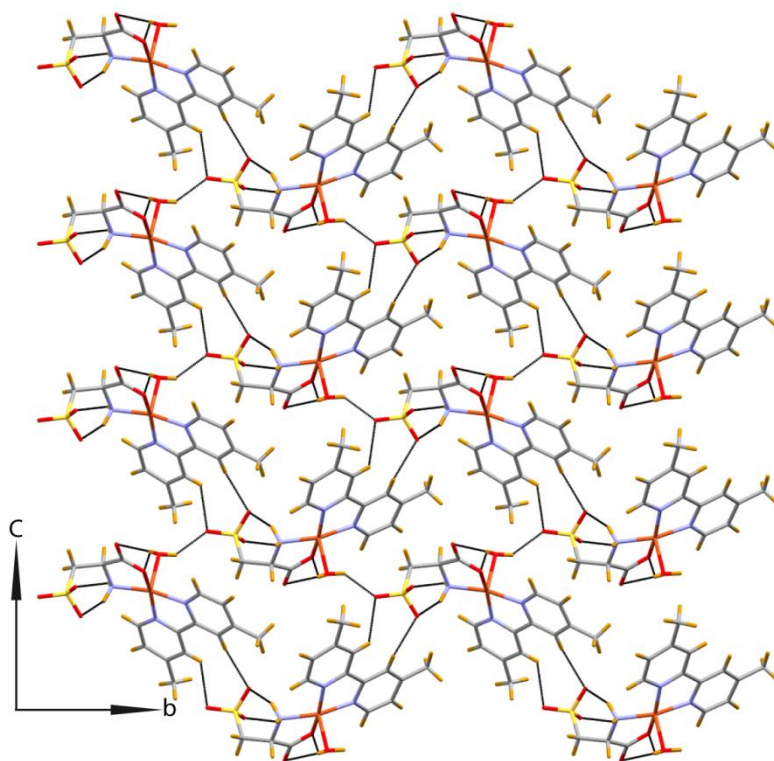

**Fig. S4.** *Mercury view of the crystal structure of 1 along the a-axis showing the three-dimensional network via the hydrogen bonds through C-H...O, N-H...O and O-H...O atoms*

**Table S :** Selected bond lengths (Å) and bond angles (°) of compounds **1-3**.

| <b>Compound 1</b> |     |            |            |     |     |          |            |
|-------------------|-----|------------|------------|-----|-----|----------|------------|
| Cu1               | O1  | 1.950(3)   |            | S1  | C3  | 1.781(4) |            |
| Cu1               | O1W | 2.231(4)   |            | O1  | C1  | 1.263(4) |            |
| Cu1               | N1  | 1.970(4)   |            | O2  | C1  | 1.227(5) |            |
| Cu1               | N2  | 1.989(3)   |            | N1  | C2  | 1.478(5) |            |
| Cu1               | N3  | 2.004(3)   |            | N2  | C8  | 1.349(4) |            |
| S1                | O3  | 1.440(3)   |            | N2  | C4  | 1.340(4) |            |
| S1                | O4  | 1.424(3)   |            | N3  | C13 | 1.343(4) |            |
| S1                | O5  | 1.425(3)   |            | N3  | C9  | 1.356(4) |            |
|                   |     |            |            |     |     |          |            |
| O1                | Cu1 | O1W        | 93.48(11)  | Cu1 | O1  | C1       | 116.2(2)   |
| O1                | Cu1 | N1         | 83.75(11)  | Cu1 | N1  | C2       | 108.7(2)   |
| O1                | Cu1 | N2         | 94.05(10)  | C4  | N2  | C8       | 118.5(3)   |
| O1                | Cu1 | N3         | 164.96(11) | Cu1 | N2  | C8       | 115.1(2)   |
| O1W               | Cu1 | N1         | 91.92(13)  | Cu1 | N2  | C4       | 126.4(2)   |
| O1W               | Cu1 | N2         | 102.96(12) | C9  | N3  | C13      | 118.0(3)   |
| O1W               | Cu1 | N3         | 101.52(11) | Cu1 | N3  | C13      | 127.6(2)   |
| N1                | Cu1 | N2         | 165.08(12) | N2  | C4  | C5       | 121.9(3)   |
| N1                | Cu1 | N3         | 96.83(12)  | Cu1 | N3  | C9       | 114.43(19) |
| N2                | Cu1 | N3         | 81.51(11)  | O2  | C1  | C2       | 119.9(3)   |
| O3                | S1  | O4         | 111.3(2)   | O1  | C1  | O2       | 124.6(3)   |
| O3                | S1  | O5         | 111.9(2)   | O1  | C1  | C2       | 115.5(3)   |
| O3                | S1  | C3         | 106.69(18) | N1  | C2  | C3       | 111.7(3)   |
| O4                | S1  | O5         | 113.0(2)   | N1  | C2  | C1       | 110.1(3)   |
| O4                | S1  | C3         | 108.11(18) | S1  | C3  | C2       | 115.8(2)   |
| O5                | S1  | C3         | 105.5(2)   |     |     |          |            |
|                   |     |            |            |     |     |          |            |
| <b>Compound 2</b> |     |            |            |     |     |          |            |
| Mn1               | C11 | 2.4569(15) |            | N2  | C10 | 1.337(3) |            |
| Mn1               | N1  | 2.314(2)   |            | N3  | C13 | 1.338(3) |            |
| Mn1               | N2  | 2.262(2)   |            | N3  | C17 | 1.345(3) |            |
| Mn1               | N3  | 2.271(2)   |            | N4  | C18 | 1.343(3) |            |
| Mn1               | N4  | 2.313(2)   |            | N4  | C22 | 1.336(4) |            |

|     |     |          |           |     |    |          |            |
|-----|-----|----------|-----------|-----|----|----------|------------|
| Mn1 | N5  | 2.173(3) |           | N5  | N6 | 1.109(4) |            |
| N1  | C1  | 1.342(3) |           | N6  | N7 | 1.191(4) |            |
| N1  | C5  | 1.349(3) |           | N2  | C6 | 1.343(3) |            |
| Cl1 | Mn1 | N1       | 168.74(5) | Mn1 | N2 | C6       | 118.91(15) |
| Cl1 | Mn1 | N2       | 97.47(6)  | Mn1 | N2 | C10      | 122.81(16) |
| Cl1 | Mn1 | N3       | 93.16(6)  | C6  | N2 | C10      | 118.13(19) |
| Cl1 | Mn1 | N4       | 89.44(6)  | Mn1 | N3 | C13      | 121.86(18) |
| Cl1 | Mn1 | N5       | 97.51(8)  | Mn1 | N3 | C17      | 116.29(15) |
| N1  | Mn1 | N2       | 71.39(7)  | Mn1 | N4 | C18      | 116.29(16) |
| N1  | Mn1 | N3       | 97.05(7)  | Mn1 | N4 | C22      | 126.51(18) |
| N1  | Mn1 | N4       | 89.21(7)  | C18 | N4 | C22      | 117.2(2)   |
| N1  | Mn1 | N5       | 86.27(9)  | Mn1 | N5 | N6       | 125.9(2)   |
| N2  | Mn1 | N3       | 160.35(8) | N5  | N6 | N7       | 178.8(4)   |
| N2  | Mn1 | N4       | 91.61(7)  | N1  | C1 | C2       | 123.3(2)   |
| N2  | Mn1 | N5       | 99.45(8)  | C13 | N3 | C17      | 117.2(2)   |
| N3  | Mn1 | N4       | 71.95(7)  | Mn1 | N1 | C1       | 125.16(16) |
| N3  | Mn1 | N5       | 95.48(9)  | Mn1 | N1 | C5       | 117.33(15) |
| N4  | Mn1 | N5       | 166.02(9) | C1  | N1 | C5       | 117.5(2)   |

### Compound 3

|     |     |            |           |     |     |          |          |
|-----|-----|------------|-----------|-----|-----|----------|----------|
| Co1 | N1  | 1.937(3)   |           | N1  | C1  | 1.357(4) |          |
| Co1 | N2  | 1.947(3)   |           | N1  | C5  | 1.356(4) |          |
| Co1 | N3  | 1.930(3)   |           | N2  | C6  | 1.349(4) |          |
| Co1 | N4  | 1.936(3)   |           | N2  | C10 | 1.350(4) |          |
| Co1 | N5  | 1.925(3)   |           | N3  | C17 | 1.354(4) |          |
| Co1 | N6  | 1.925(3)   |           | N3  | C13 | 1.357(4) |          |
| Co2 | Cl1 | 2.2982(16) |           | N4  | C18 | 1.362(4) |          |
| Co2 | Cl2 | 2.267(2)   |           | N4  | C22 | 1.347(4) |          |
| Co2 | Cl3 | 2.2790(17) |           | N5  | C29 | 1.363(4) |          |
| Co2 | Cl4 | 2.258(2)   |           | N5  | C25 | 1.350(4) |          |
| N6  | C30 | 1.348(4)   |           | N6  | C34 | 1.351(4) |          |
| N1  | Co1 | N2         | 83.20(10) | Co1 | N1  | C5       | 114.5(2) |
| N1  | Co1 | N3         | 87.71(10) | Co1 | N1  | C1       | 127.4(2) |
| N1  | Co1 | N4         | 93.59(11) | C1  | N1  | C5       | 118.2(3) |

|     |     |     |            |     |     |     |           |
|-----|-----|-----|------------|-----|-----|-----|-----------|
| N1  | Co1 | N5  | 93.93(10)  | Co1 | N2  | C10 | 127.9(2)  |
| N1  | Co1 | N6  | 176.20(11) | C6  | N2  | C10 | 118.0(3)  |
| N2  | Co1 | N3  | 94.12(11)  | Co1 | N2  | C6  | 114.2(2)  |
| N2  | Co1 | N4  | 175.98(11) | Co1 | N3  | C17 | 114.6(2)  |
| N2  | Co1 | N5  | 89.23(10)  | C13 | N3  | C17 | 118.1(3)  |
| N2  | Co1 | N6  | 94.00(11)  | Co1 | N3  | C13 | 127.3(2)  |
| N3  | Co1 | N4  | 83.32(10)  | C18 | N4  | C22 | 118.4(3)  |
| N3  | Co1 | N5  | 176.43(11) | Co1 | N4  | C22 | 127.4(2)  |
| N3  | Co1 | N6  | 95.08(11)  | Co1 | N4  | C18 | 114.1(2)  |
| N4  | Co1 | N5  | 93.40(10)  | Co1 | N5  | C29 | 114.7(2)  |
| N4  | Co1 | N6  | 89.31(11)  | Co1 | N5  | C25 | 127.3(2)  |
| N5  | Co1 | N6  | 83.43(10)  | C25 | N5  | C29 | 117.9(3)  |
| Cl3 | Co2 | Cl4 | 109.85(6)  | Co1 | N6  | C34 | 126.7(2)  |
| Cl1 | Co2 | Cl4 | 110.04(7)  | Co1 | N6  | C30 | 114.5(2)  |
| Cl1 | Co2 | Cl2 | 113.69(6)  | C30 | N6  | C34 | 118.8(3)  |
| Cl1 | Co2 | Cl3 | 106.53(5)  | Cl2 | Co2 | Cl3 | 110.20(6) |
| Cl2 | Co2 | Cl4 | 106.54(6)  |     |     |     |           |

**Table 3** Hydrogen bond parameters determined by the PLATON software for compounds **1-3**

| <b>D</b>                                                                       | <b>H</b> | <b>A</b> | <b>D - H</b> | <b>H...A</b> | <b>D...A</b> | <b>D - H...A</b> |
|--------------------------------------------------------------------------------|----------|----------|--------------|--------------|--------------|------------------|
| <b>Compound 1</b>                                                              |          |          |              |              |              |                  |
| N1                                                                             | H1A      | O4 #1    | 0.9000       | 2.1100       | 2.816(5)     | 135.00           |
| N1                                                                             | H1B      | O3       | 0.9000       | 2.0900       | 2.846(5)     | 141.00           |
| O1W                                                                            | H1W      | O5 #2    | 0.853(16)    | 2.04(3)      | 2.753(5)     | 141(4)           |
| O1W                                                                            | H2W      | O1 #1    | 0.85(3)      | 2.42(3)      | 3.112(5)     | 140(3)           |
| O1W                                                                            | H2W      | O2 #1    | 0.85(3)      | 2.14(3)      | 2.936(5)     | 156(3)           |
| C4                                                                             | H4       | O1       | 0.9300       | 2.5900       | 3.067(5)     | 113.00           |
| C7                                                                             | H7       | O3 #3    | 0.9300       | 2.4300       | 3.309(5)     | 158.00           |
| C10                                                                            | H10      | O5 #3    | 0.9300       | 2.5200       | 3.168(6)     | 127.00           |
| <b>Symmetry Code : #1 : -1+x,y,z ; #2 : 2-x,1/2+y,2-z ; #3 : 2-x,1/2+y,1-z</b> |          |          |              |              |              |                  |

---

**Compound 2**

---

|     |      |        |        |        |          |        |
|-----|------|--------|--------|--------|----------|--------|
| C4  | H4   | C11 #1 | 0.9500 | 2.7800 | 3.710(3) | 166.00 |
| C21 | H21  | C11 #2 | 0.9500 | 2.8100 | 3.632(4) | 145.00 |
| C23 | H23C | C11 #3 | 0.9800 | 2.7900 | 3.683(4) | 151.00 |

---

**Symmetry Code :** #1 :  $x, 1/2-y, -1/2+z$  ; #2 :  $-x, 1-y, 1-z$  ; #3 :  $1+x, 1/2-y, 1/2+z$

---

**Compound 3**

---

|     |      |        |        |        |           |        |
|-----|------|--------|--------|--------|-----------|--------|
| O1W | H11  | O4W    | 0.8500 | 2.4000 | 2.881(5)  | 116.00 |
| O1W | H12  | C12    | 0.8500 | 2.4500 | 3.233(4)  | 152.00 |
| O2W | H21  | C13 #1 | 0.8500 | 2.5600 | 3.303(5)  | 147.00 |
| O3W | H32  | O4W    | 0.8400 | 2.0200 | 2.845(6)  | 168.00 |
| O4W | H42  | O1W    | 0.8600 | 2.0400 | 2.881(5)  | 166.00 |
| O5W | H51  | C15#2  | 0.8500 | 2.7000 | 3.385(13) | 138.00 |
| O6W | H62  | C15 #3 | 0.8500 | 2.7000 | 3.200(4)  | 119.00 |
| O7W | H71  | C11#4  | 0.8500 | 2.4100 | 3.247(4)  | 169.00 |
| O7W | H72  | O2W    | 0.8500 | 1.9300 | 2.729(5)  | 155.00 |
| C1  | H1   | N4     | 0.9300 | 2.5100 | 3.007(4)  | 113.00 |
| C2  | H2   | O6W #5 | 0.9300 | 2.5900 | 3.497(5)  | 165.00 |
| C7  | H7   | C14 #2 | 0.9300 | 2.6700 | 3.585(4)  | 169.00 |
| C9  | H9   | O7W #6 | 0.9300 | 2.5700 | 3.372(5)  | 144.00 |
| C10 | H10  | N6     | 0.9300 | 2.5500 | 3.033(5)  | 113.00 |
| C13 | H13  | N2     | 0.9300 | 2.5300 | 3.022(4)  | 113.00 |
| C19 | H19  | C11 #5 | 0.9300 | 2.7100 | 3.633(4)  | 171.00 |
| C22 | H22A | N5     | 0.9300 | 2.5000 | 2.992(4)  | 113.00 |
| C25 | H25  | N1     | 0.9300 | 2.5100 | 3.008(5)  | 114.00 |
| C33 | H33  | C12 #3 | 0.9300 | 2.8100 | 3.680(4)  | 157.00 |
| C34 | H34  | N3     | 0.9300 | 2.5200 | 3.023(5)  | 114.00 |
| C35 | H35A | C14 #7 | 0.9600 | 2.7200 | 3.507(6)  | 139.00 |

---

**Symmetry Code :** #1 :  $x, 1/2-y, -1/2+z$  ; #2 :  $x, -1/2-y, 1/2+z$  ; #3 :  $-1+x, y, z$  ; #4 :  $2-x, -1/2+y, 1/2-z$  ; #5 :  $1-x, -1/2+y, 1/2-z$  ; #6 :  $-1+x, 1/2-y, 1/2+z$  ; #7 :  $1-x, 1-y, 1-z$

---
